# Supplementary material for: Variation in physical development in schoolboy rugby players: can maturity testing reduce mismatch?
Source: PubMed Central journal article supplement — BMJ Open. 2012 Jul 11;2(4):e001149. doi: 10.1136/bmjopen-2012-001149 (PMC3400077; doi:10.1136/bmjopen-2012-001149), 2012-07-11
Supplement: bmjopen-2012-001149.draft_revisions.pdf [file bmjopen-2012-001149.draft_revisions.pdf]

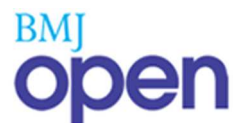

**Variation in physical development in schoolboy rugby players - can maturity testing reduce mismatch?**

|                                 |                                                                                                                                                                                                                                                                                                                                                                                                                         |
|---------------------------------|-------------------------------------------------------------------------------------------------------------------------------------------------------------------------------------------------------------------------------------------------------------------------------------------------------------------------------------------------------------------------------------------------------------------------|
| Journal:                        | <i>BMJ Open</i>                                                                                                                                                                                                                                                                                                                                                                                                         |
| Manuscript ID:                  | bmjopen-2012-001149                                                                                                                                                                                                                                                                                                                                                                                                     |
| Article Type:                   | Research                                                                                                                                                                                                                                                                                                                                                                                                                |
| Date Submitted by the Author:   | 12-Mar-2012                                                                                                                                                                                                                                                                                                                                                                                                             |
| Complete List of Authors:       | Nutton, Richard; Royal Infirmary of Edinburgh, Orthopaedics and Trauma<br>Mitchell, Martin; Royal Infirmary of Edinburgh, Orthopaedics and Trauma<br>Hamilton, David; University of Edinburgh, Orthopaedics and Trauma<br>Hutchison, James; University of Aberdeen, Orthopaedics and Trauma<br>Simpson, Hamish; University of Edinburgh, Orthopaedics and Trauma<br>MacLean, James; Perth Royal Infirmary, Orthopaedics |
| <b>Primary Subject Heading</b>: | Health policy                                                                                                                                                                                                                                                                                                                                                                                                           |
| Secondary Subject Heading:      | Paediatrics, Sports and exercise medicine                                                                                                                                                                                                                                                                                                                                                                               |
| Keywords:                       | Public health < INFECTIOUS DISEASES, PAEDIATRICS, SPORTS MEDICINE                                                                                                                                                                                                                                                                                                                                                       |
|                                 |                                                                                                                                                                                                                                                                                                                                                                                                                         |

SCHOLARONE™  
Manuscripts

1  
2  
3 **Variation in physical development in schoolboy rugby players - can maturity**  
4 **testing reduce mismatch?**  
5  
6

7 Nutton RW<sup>1</sup>, Mitchell MJ<sup>1</sup>, Hamilton DF<sup>2</sup>, Hutchison JD<sup>3</sup>, Simpson AHRW<sup>1,2</sup>, MacLean JGB<sup>4</sup>  
8  
9

- 10 1. Department of Trauma and Orthopaedics, Royal Infirmary of Edinburgh, UK  
11 2. Department of Orthopaedics, University of Edinburgh, UK  
12 3. Department of Orthopaedic Surgery, University of Aberdeen, UK  
13 4. Department of Orthopaedics, Perth Royal Infirmary, UK  
14  
15  
16

17 **Corresponding Authors:**

18 Richard W. Nutton MD FRCS  
19 Consultant Orthopaedic Surgeon  
20 Department of Trauma and Orthopaedics  
21 Royal Infirmary of Edinburgh  
22 Old Dalkeith Road  
23 Little France  
24 Edinburgh  
25 EH16 4SA  
26 [Richard.Nutton@luht.scot.nhs.uk](mailto:Richard.Nutton@luht.scot.nhs.uk)  
27  
28  
29  
30  
31

32 James G B MacLean FRCS  
33 Consultant Orthopaedic Surgeon  
34 Perth Royal Infirmary  
35 Perth  
36 PH1 1QJ  
37 jamie.maclean@nhs.net  
38  
39  
40  
41

42 **Suggested key words:** Adolescent; Rugby; Injury; Maturity; Screening  
43  
44

45 **Word Count:** 2498  
46  
47  
48  
49  
50  
51  
52  
53  
54  
55  
56  
57  
58  
59  
60

## ABSTRACT

**Objectives:** The aim of this study was to obtain normative data for physical characteristics of current day schoolboy rugby players, a secondary aim was to assess the efficacy of an objective measure of physical maturity, the use of which has been associated with reduced injury rates.

**Design:** Cross sectional cohort study

**Setting:** Three Scottish schools and various 'regional assessment centres' organised by the Scottish Rugby Union

**Participants:** 382 schoolboys (across the 3 schools) aged between 12-18 years, and 472 schoolboys aged 15 assessed at the regional centres

**Outcome measures:** height, weight and grip strength

**Results:** Values of height weight and grip strength in this cohort were found substantially to exceed previous figures regarded as physically mature. When the same test for maturity was applied to the second cohort of 472 fifteen year old boys, 97.2% were deemed physically mature. Applying new parameters based on the mean data of 17 year old players resulted in 7.7% achieving maturity criteria.

**Conclusion:** Large morphological variation was observed in schoolboy rugby players of the same age. Previous parameters of physical maturity were not suitable to assess current schoolboys. New criteria were found to be better at differentiating 15 year old players as suitable to play senior schools rugby.

### Article focus

The primary aim of this study was to obtain normative data for physical characteristics of current day schoolboy rugby players.

A secondary aim was to assess the efficacy of an objective measure of physical maturity, the use of which has been associated with reduced injury rates.

### Key messages

Large morphological variation was observed in schoolboy rugby players of the same chronological age.

Previous parameters of physical maturity were not suitable to assess current schoolboys.

New criteria were found to be better at differentiating 15 year old players as suitable to play senior schools rugby.

### Strengths and limitations

The screening method proposed is hypothetical without specific injury data to support its efficacy. It is however based on current population data of schoolboy rugby players and applies established concepts. Confirmation of the benefits of this system is only possible if robust mechanisms for recording injuries are implemented, which they should be as matter of major priority.

## INTRODUCTION

Since the advent of professionalism in 1995, injury rates have been seen to increase in senior rugby<sup>1</sup> and although unproven, the same is suspected in schoolboy rugby. In 2006, Allan<sup>2</sup> reported an unprecedented increase in the incidence of catastrophic spinal injuries amongst teenage rugby players admitted to the Queen Elizabeth National Spinal Injuries Unit in Glasgow. Mismatch between opponents was highlighted as a possible contributory factor in these injuries.

The avoidance of mismatch is traditionally addressed by playing schoolboys in their year groups; however year groups combine at 16 to compete in senior (U18) schools rugby. In contrast to the other home nations, Scottish boys aged 15 are regularly involved in senior school rugby, in part due to the relatively small playing population and in part due to the tradition of leaving senior school at an earlier age as a consequence of the examination system.

It is well recognised that within any selected year group a wide spectrum of physical maturity exists<sup>3</sup> and this is likely to be at its maximum between the ages of 13 and 15 during which peak growth velocity usually occurs. In some American states a maturity assessment is used as pre-participation screening for some collision sports<sup>4-6</sup>, and there is some evidence to suggest that matching athletes for sexual maturity is associated with a reduced injury rate<sup>7</sup>. Previous studies have correlated specified height and grip strength values with the attainment of physical maturity as defined by the Tanner scale<sup>7-9</sup>. A similar maturity assessment was introduced by the Scottish Rugby Union in the hope that, by differentiating 15 year old players by physical maturity, the risk of mismatch in this age group may be reduced.

The aim of this study was to obtain normative data for physical characteristics of current day schoolboy rugby players, a secondary aim was to assess the efficacy of an objective measure of physical maturity, the use of which has been associated with reduced injury rates.

## MATERIALS AND METHODS

At the beginning of the 2009-10 season, the Scottish Rugby Union (SRU) established maturity assessment centres throughout Scotland for all 15 year olds wishing to play senior school rugby in positions other than the front row. This was introduced as part of a programme to improve safety in the game (*"Are you ready to play rugby"*) and

1  
2  
3 had been recommended by a subgroup of the Scottish Committee on Orthopaedics  
4 and Trauma (SCOT).  
5  
6

7  
8 Testing was performed by trained medical personnel using hand held dynamometers  
9 (Jamar, Asimow Engineering Co, Los Angeles), calibrated following the  
10 manufacturer's recommendation; height and weight were measured using standard  
11 equipment. To be regarded as mature, and therefore able to play in the U-18 age  
12 group, players had to fulfil the following physical conditions<sup>10</sup>: height >165cm, and  
13 grip strength > 25kg.  
14  
15  
16

17  
18 In the second part of this study a cohort of 382 rugby-playing boys age 12 to 18  
19 years were assessed at three Scottish rugby-playing secondary schools between  
20 December 2009 and October 2010. Height, weight, and grip strength were  
21 measured by trained personnel using the same standardised protocol. Each pupil  
22 was asked about any injury which occurred during a competitive game or during  
23 training over the preceding 12 months. An injury was defined as "any incident  
24 requiring medical advice or attention"<sup>11</sup>. Ethical approval was obtained from the Fife  
25 and Forth Valley Ethics Committee to undertake this part of the study. Supervision of  
26 the study was by members of the SCOT subgroup.  
27  
28  
29  
30  
31  
32

33 Data were analysed using SPSS (version 14, IBM, Chicago, USA) and manually  
34 assessed for normality. Independent samples t-tests were employed to assess  
35 differences between age grades for all variables. Statistical significance was  
36 accepted as  $p < 0.05$ .  
37  
38  
39  
40  
41  
42

## 43 RESULTS

44 472 boys aged 15 years presented to the SRU for maturity testing. Their mean height  
45 was 1.77m (range 1.56-1.99m), mean weight 74.44kgs (range 46.00-127.05kg) and  
46 mean grip strength 44.15kgs (range 20.5-80.0kg). Using the criteria established from  
47 previous studies as an indication of physical maturity (height >165cms, grip strength  
48 > 25kg), 97.2% were deemed physically mature and thus eligible to play in the U18  
49 age group.  
50  
51  
52

53  
54  
55 382 schoolboy rugby players were assessed in the cohort study. The mean height,  
56 weight and grip strength are displayed in Table 1. As expected, the measurements  
57 increased with age. There was a statistical difference in height, weight and grip  
58  
59  
60

strength year on year up to the age of 15 ( $p < 0.001$ ). Above the age of 15, year on year differences in weight and grip strength remained significant ( $p < 0.05$ ), but differences in height did not. The range of these physical parameters that exists within and between year groups is apparent in table 1 which demonstrates the potential for mismatch.

Table 1 – mean (+/-SD) physical parameters by age grade

| Age           | 12          | 13                 | 14          | 15          | 16          | 17          | 18          |
|---------------|-------------|--------------------|-------------|-------------|-------------|-------------|-------------|
| Height        | 155 +/- 7.6 | 163 +/- 54 +/- 7.8 | 170 +/- 7.5 | 175 +/- 7.0 | 179 +/- 7.5 | 180 +/- 6.2 | 182 +/- 8.1 |
| Weight        | 48 +/- 9.2  | 10.8               | 61 +/- 9.8  | 68 +/- 11.4 | 72 +/- 10.2 | 76 +/- 12.8 | 84 +/- 14.9 |
| Grip Strength | 23 +/- 3.9  | 27 +/- 5.0         | 33 +/- 8.1  | 38 +/- 6.9  | 42 +/- 8.1  | 43 +/- 8.1  | 46 +/- 6.9  |

The incidence of injury in each age group is illustrated in Figure 1. Overall, there were 118 injuries sustained in 104 boys. Boys aged 15 years had the highest (40%) incidence of self-reported injury. As is evident in Table 2 upper limb injuries (42%) were the most prevalent site of injury in all age groups except 16 year olds in whom concussion occurred more frequently. Of the 15 boys who sustained concussions (23 injuries), 4 had sustained at least 2 separate injuries (range 2-4). Fractures constituted 31% of the injuries. There were no significant differences in injury incidence between schools.

Table 2 – injury rates per age grade

| Age (years)       | 12       | 13        | 14        | 15        | 16        | 17        | 18       |
|-------------------|----------|-----------|-----------|-----------|-----------|-----------|----------|
| Number of players | 54       | 66        | 63        | 65        | 55        | 62        | 16       |
| Total injuries    | 8 (14.8) | 15 (22.7) | 18 (28.6) | 26 (40)   | 15 (27.3) | 17 (27.4) | 5 (31.3) |
| Body Region       |          |           |           |           |           |           |          |
| Head / neck       | 2 (25)   | 1 (5.9)   | 3 (15.8)  | 6 (20.7)  | 1 (4.8)   | 2 (11.1)  | 1 (16.7) |
| Upper limb        | 4 (50)   | 9 (52.9)  | 9 (47.4)  | 11 (37.9) | 3 (14.3)  | 11 (61.1) | 2 (33.3) |
| Lower limb        | 2 (25)   | 2 (11.8)  | 5 (26.3)  | 6 (20.7)  | 5 (23.8)  | 1 (22.2)  | 1 (16.7) |
| Torso             | 0 (0)    | 0 (0)     | 2 (10.5)  | 2 (6.9)   | 1 (4.8)   | 1 (22.2)  | 2 (33.3) |
| Concussion        | 0        | 5         | 0         | 4         | 11        | 3         | 0        |

Total injuries expressed as n (% of players per age grade), injuries by body region expressed as n (% of total injuries)

As the median age of boys playing senior school rugby was 17 years, we assessed how many 15 year olds would meet the mean height, weight and grip strength of the

17 year age group (180cm height, 76kg weight and 43kg grip strength). The numbers meeting each of these criteria, and various combinations of the criteria, are shown in Table 3. Only 7.7% of the 15 year olds had the mean grip strength and weight of a 17 year old whilst including height as a requirement (the one parameter which did not continue to increase with age) reduced this figure to 6.2%.

Table 3 - Consequences of testing 15 yr olds against mean 17 yr old parameters (Height 180cm, weight 76kg, grip strength 43kg)

| 15 year mean                       | Above 17 yr old mean (n) | Below 17 yr old mean (n) | % Meeting requirement |
|------------------------------------|--------------------------|--------------------------|-----------------------|
| Grip Strength<br>+ Height + Weight | 4                        | 61                       | 6.20%                 |
| Grip Strength<br>+ Height          | 9                        | 56                       | 13.80%                |
| Grip Strength<br>+ Weight          | 5                        | 60                       | 7.70%                 |

The effect of applying thresholds for grip strength according to historical values (A) and those based on the values of a 17 year old (B) are displayed in Figure 2 with the resultant narrowing of range and potential reduction in mismatch that a 15 year old might encounter when playing under the new regulations.

## DISCUSSION

The popularity of rugby as a sport for teenagers is threatened by concerns about the potential for serious injury<sup>12,13</sup>. Since the advent of professionalism in 1995, the game has become far more physical<sup>14</sup>, and injuries in elite players are commonplace. The reported incidence of injury in youth rugby varies between countries, from 7:1000 player hours in South Africa, to 27.5:1000 player hours in New Zealand<sup>15-17</sup>. The difference in incidence is probably due to inconsistency in the recording of injuries, as well as lack of standardisation of injury definition. The incidence of injury has been shown to increase with age and physical maturity<sup>18-21</sup>. Our results for 15 year olds differ from these findings and showed a worrying increase in injury rate which would have been associated with a greater degree of physical mismatch in these players. If immature individuals play against more mature opponents with a greater muscle mass, a mismatch occurs potentially placing the less mature individual at a greater risk of injury. This was the reasoning behind incorporating maturity testing with the

1  
2  
3 “Are you ready to play rugby” programme introduced by the SRU in response to the  
4 rising incidence of serious spinal injuries in schoolboy rugby in Scotland.  
5  
6

7  
8 During puberty there is an increase in body weight, principally due to muscle mass,  
9 which can be quantified by measuring grip strength. This is the principle on which our  
10 initial testing was based as suggested by other studies<sup>10</sup>. We focussed on 15 year  
11 olds as this age represents the watershed between junior and senior school rugby  
12 with some individuals playing at either or both levels. In addition it is during this  
13 period that major variation in physical maturity can exist.  
14  
15

16  
17  
18 The SRU Group results showed that height and grip strength failed to discriminate  
19 between a large cohort of 15 year old rugby players with almost all (97.2%) deemed  
20 as mature. This could be explained by suggesting that this study population was a  
21 more athletic group to that on which the parameters were based, namely youths in a  
22 juvenile correctional facility in Washington State<sup>10</sup>. However when compared with  
23 normative data for American adolescents in a previous study<sup>22</sup>, the mean grip  
24 strengths for adolescent boys were almost identical to those measured in our series.  
25 The group tested by the SRU, however, were not comparable to previous normative  
26 data and represent a subset of aspiring athletes who were likely to be stronger and  
27 bigger than average for their year group. The range of values for height (1.56-1.99m),  
28 weight (46-127kg) and grip strength (21-80kg) recorded in this group of 15 year old  
29 boys is remarkable and demonstrates the variability in physical development  
30 irrespective of age.  
31  
32  
33  
34  
35  
36  
37  
38

39  
40 Limited normative data exist on the physical attributes of adolescent rugby players  
41 and it was felt that this was fundamental to distinguishing between different players of  
42 the same age. Whilst weight and grip strength were observed to increase  
43 incrementally with age, height levelled off over 16 years. Height was previously  
44 recognised<sup>23</sup> as an important determinant of physical maturity with the period of peak  
45 growth around the “growth spurt” associated with an increased risk of injury. Peak  
46 height velocity occurs at a median age of 14 years in North American boys with the  
47 95% confidence interval extending from 11.5 to 15.5 years<sup>24</sup>. In the light of this  
48 information it is not surprising that height is less likely to be a discriminator when the  
49 15 year age group, at the upper limit of the growth spurt, is being assessed. From the  
50 normative data obtained it seemed more logical to compare the height, weight and  
51 grip strength of 15 year olds with the means of those age groups they would  
52 encounter if they played in senior school rugby. As 17 is the median age of senior  
53  
54  
55  
56  
57  
58  
59  
60



1  
2  
3 school rugby (16 -18 year group) the mean values of a 17 year old were chosen as  
4 threshold values which a 15 year old should achieve if he were to enjoy a degree of  
5 physical compatibility with his peers, hopefully reducing his risk of injury.  
6  
7

8  
9 Table 3 demonstrated the effect of applying the mean values of the 17 year old boys  
10 in the same schools to the 15 year olds. When the different combinations of height,  
11 weight and grip strength were assessed, height proved to be the least discriminatory,  
12 as predicted. It has been recorded<sup>10</sup> that there is a group of taller boys who, whilst  
13 regarded as pubertally mature, do not possess the muscular strength of peers of  
14 similar height. It was therefore decided that grip strength and weight should be  
15 selected as the key parameters for testing. Using these parameters alone, 7.7% of  
16 15 year olds in this cohort achieved the mean weight and grip strength of a 17 year  
17 old.  
18  
19  
20  
21  
22  
23

24 Whilst mismatch is recognised as an issue internationally, maturity testing is not  
25 universally practised in the major rugby playing countries. In New Zealand both age  
26 and weight are taken into account in youth rugby. Players who are significantly  
27 heavier than their peers may play at a more senior grade and underweight individuals  
28 may play down an age grade, although variation does exist between different  
29 districts. South African youth rugby is banded according to age, with players only  
30 able to play within a certain age group if their age falls within two years of that group.  
31 The Boksmart<sup>25</sup> rugby safety initiative was launched by the South African Rugby  
32 Union in 2009 to combat a comparatively high rate of catastrophic injuries, both in  
33 youth and senior rugby. It followed a similar programme, "Rugby smart", in New  
34 Zealand<sup>26</sup> commenced in 2001 which has been shown to reduce the incidence of  
35 spinal injuries<sup>27</sup>. Boksmart includes comparison of individuals with normative data for  
36 age groups including body mass, fitness tests and some basic strength tests.  
37 Guidelines for players wishing to play out with their age group are well defined,  
38 requiring full rugby-specific assessments by qualified sports practitioners, letters from  
39 conditioning coaches, team doctors and coaches, confirming the suitability of the  
40 player. A similar approach exists in Australia with streaming according to age group  
41 up to U19 level, and players being unable to compete more than two years above  
42 their respective age group<sup>28</sup>. Those who wish to play up beyond the two-year window  
43 require their coach to fill out an exemption form addressing issues such as level of  
44 experience, playing position, use of strength training, and perceived level of maturity.  
45 In none of these countries do any objective criteria exist for physical testing.  
46  
47  
48  
49  
50  
51  
52  
53  
54  
55  
56  
57  
58  
59  
60

1  
2  
3 Currently the SRU have adopted the condition that any 15 year old wishing to play in  
4 the U18 age group, in a position other than the front row, has to achieve the mean  
5 weight and grip strength of the 17 year old age group. Specified U16 age group  
6 rugby exists in some countries and the delay this imparts on the progress of 15 year  
7 olds into senior school rugby is logical, particularly as this may coincide with a time in  
8 their physical development where there is greatest variation in physical maturity. The  
9 physical variation we have observed within the same age groups however would  
10 suggest that additional assessment of physical development is advisable and this  
11 was the conclusion of a study on soccer injuries and their relation to maturity<sup>29</sup>.  
12  
13  
14  
15  
16  
17

18 To date our focus has been on the 15 year age group. With further data collection it  
19 may be that criteria could be identified for all age bands, with players of similar  
20 physical development playing together as they mature at differing rates. Potentially  
21 this could identify more developed individuals, such as some 15 year olds observed  
22 in the SRU group, who should play in older age groups thus reducing the risk of  
23 injury to their age peers, or immature individuals who should play in younger age  
24 groups, reducing their own risk of injury.  
25  
26  
27  
28  
29

30 In the absence of robust injury data, but confronted with an upsurge in serious neck  
31 injury in Scotland, it was felt that the introduction of maturity assessment in  
32 schoolboy rugby was a valuable adjunct to other measures that have been taken to  
33 increase safety. To date since the inception of these measures, no schoolboy rugby  
34 player with a serious neck injury has been admitted to the National Spinal Injuries  
35 Unit in Glasgow. It is accepted, however, that the screening method we are  
36 proposing is hypothetical without any injury data to support its efficacy. It is however  
37 based on current population data involving schoolboy rugby players, applying  
38 concepts established in American schools contact sports, based on the only literature  
39 available on this subject.  
40  
41  
42  
43  
44  
45  
46

47 Reducing the risk of injury in contact sports should be a universal aim, and it will only  
48 be achieved once we know accurately the size and severity of the problem. Previous  
49 authors have expressed concerns regarding the wide variation in shape and size of  
50 same-aged schoolboys. We would suggest that inclusion of indicators of maturity and  
51 physical development within the injury surveillance is important. In conclusion we  
52 believe maturity testing has reduced physical mismatch in schoolboy rugby players.  
53 To confirm this assertion it is essential that rugby unions put in place robust  
54 mechanisms for recording injuries as matter of major priority.  
55  
56  
57  
58  
59  
60

1  
2  
3 **ACKNOWLEDGEMENTS:** The authors acknowledge the assistance of the staff at  
4 the three secondary schools visited, particularly the heads of department for physical  
5 education. Thanks must also be paid to the continued support from the SRU, and in  
6 particular to the efforts of Nick Rennie and Dr James Robson. The authors also thank  
7 the doctors, physiotherapists, medical students, and research personnel for the  
8 organisation of testing, and gathering of the data. Special thanks must go to Deborah  
9 MacDonald, Gavin MacPherson, Sally-Anne Phillips and Robert Wallace.  
10  
11  
12  
13

14  
15 **FUNDING:** The first cohort of testing was funded by the Scottish Rugby Union. The  
16 second cohort of schools based testing received support from the *Hearts and Balls*  
17 charity.  
18  
19

20  
21 **COMPETING INTERESTS:** None  
22  
23

## 24 REFERENCES

- 25  
26 1 Garroway WM, Lee AJ, Hutton SJ, Russell EBAW, Macleod DAD. Impact of  
27 professionalism on injuries in rugby union. *Br J Sports Med* 2000; 34:348-351  
28  
29 2 Allan DB, Brydone AS. Spinal injuries in Scottish youth rugby.  
30 Presentation COMOC Glasgow 2010.  
31  
32 3. Silver JR. The impact of the 21st century on rugby injuries. *Spinal Cord* 2002; 40:  
33 552-559  
34  
35 4. Caine DJ, Broekhoff J. Maturity assessment: A viable preventive measure against  
36 physical and psychological insult to the young athlete? *The Physician and Sports*  
37 *Medicine*. 1987; 15: 67–80  
38  
39 5. Grafe MW, Paul GR, Foster TE. The preparticipation examination for high school  
40 and college athletes. *Clinics in Sports Med*. 1997; 16:569-591  
41  
42 6. <http://www.mdch.state.mi.us/pha/vipf2/football.htm> (last accessed 22.11.2011)  
43  
44 7. Kreipe RE, Gewanter HL. Physical maturity screening for participation in sports.  
45 *Pediatrics* 1985; 75:1076-1080  
46  
47 8. Backous DD, Friedl KE, Smith NJ, Parr TJ, Carpine WD Jr. Soccer injuries and  
48 their relation to physical maturity. *Am J Dis Child*. 1988 Aug; 142(8):839-842  
49  
50 9. Tanner JM. Growth of bone, muscle, and fat during childhood and adolescence. In:  
51 Lodge ME. ed. *Growth and development of mammals*. London: Butterworths, 1968.  
52  
53 10. Backous DD, Farrow JA, Friedl K. Assessment of pubertal maturity in boys, using  
54 height and grip strength. *J Adolesc Health Care*. 1990 Nov; 11(6):497-500  
55  
56  
57  
58  
59  
60

- 1  
2  
3 11. Fuller CW, Molloy MG, et al. Consensus statement on injury definitions and data  
4 collection procedures for studies of injuries in rugby union. *Br J Sports Med*  
5 2007;41:328-331  
6
- 7 12. Boufous S, Finch CF, Bauman A. Parental safety concerns - a barrier to sport  
8 and physical activity in children? *Aust NZ J Public Health* 2004; 28:482-486  
9
- 10 13. Nicholl JP, Coleman P, Williams BT. The epidemiology of sports and exercise  
11 related injury in the United Kingdom. *Br J Sports Med* 1995; 29:232–238  
12 14. Quarrie KL, Hopkins WG. Changes in player characteristics and match activities  
13 in Bledisloe Cup rugby union from 1972 to 2004. *J Sports Sci.* 2007 Jun; 25(8):895-  
14 903  
15
- 16 15. Pringle RG, McNair P, Stanley S. Incidence of sporting injury in New Zealand  
17 youths aged 6-15 years. *Br J Sports Med* 1998; 32:49-52  
18
- 19 16. Roux CE, Goedeke R, Visser GR, Van Zyl WA, Noakes TD. The epidemiology of  
20 schoolboy rugby injuries. *S Afr Med J* 1987; 71:307–313  
21
- 22 17. Durie RM, Munroe AD. A prospective survey of injuries in a New Zealand  
23 schoolboy rugby population. *New Zealand J Sports Med* 2000; 28:84 – 90  
24
- 25 18. Linder MM, Townsend DJ, Jones JC, Balkcom IL, Anthony CR. Incidence of  
26 adolescent injuries in junior high school football and its relationship to sexual maturity  
27 *Clin J Sport Med.* 1995 July; 5(3):167-170  
28
- 29 19. Haseler CM, Carmont MR, England M. The epidemiology of injuries in English  
30 youth community rugby union. *Br J Sports Med* 2010; 44:1093–1099.  
31
- 32 20. McIntosh AS, McCrory P, Finch CF, Wolfe R. Head, face and neck injury in youth  
33 rugby: incidence and risk factors. *Br J Sports Med* 2010; 44:188-193  
34
- 35 21. Turbeville SD, Cowan LD, Asal NR, Owen WL, Anderson MA. Risk factors for  
36 injury in middle school football players. *Am J Sports Med.* 2003 Mar-Apr; 31(2):276-  
37 281  
38
- 39 22. Mathieowitz V, Wiemer DM, Federman SM. Grip and pinch strength: norms for 6  
40 to 19 yr-olds. *Am J Occ Health* 1986; 40(10):705-712  
41
- 42 23 Caine DJ, Broekhoff J. Maturity assessment: A viable preventive measure against  
43 physical and psychological insult to the young athlete? *The Physician and Sports*  
44 *Medicine* 1987; 15(3):57-80  
45
- 46 24 Tanner JM, Davies PSW. Clinical longitudinal standards for height and height  
47 velocity for North American children. *J Pediatr* 1985; 107:317-329  
48
- 49 25. Boksmart <http://www.sarugby.co.za/boksmart/default.aspx> (last accessed  
50 22.11.2011)  
51
- 52 26. RugbySmart [http://www.nzrugby.co.nz/the\\_game/safety/rugbysmart](http://www.nzrugby.co.nz/the_game/safety/rugbysmart) (last  
53 accessed 22.11.2011)  
54
- 55 27. Quarrie KL, Gianotti SM, Hopkins WG, Hume PA. Effect of a nationwide injury  
56 prevention programme on serious spinal injuries in New Zealand rugby union:  
57 ecological study. *Brit Med J* 2007 Jun 2; 334(7604):1150  
58  
59  
60

1  
2  
3  
4 28 Australian Rugby Union Policy

5 <http://www.rugby.com.au/LinkClick.aspx?fileticket=2hjJABFRanE%3d&tabid=1970>

6 (last accessed 22.11.2011)

7  
8 29 Backhaus DB, Friedl KE, Smith NJ, Parr TJ, Carpine WD. Soccer Injuries and  
9 their relation to Physical Maturity. Am J Direct Care 1988; 142:839-842  
10  
11  
12  
13  
14  
15  
16  
17  
18  
19  
20  
21  
22  
23  
24  
25  
26  
27  
28  
29  
30  
31  
32  
33  
34  
35  
36  
37  
38  
39  
40  
41  
42  
43  
44  
45  
46  
47  
48  
49  
50  
51  
52  
53  
54  
55  
56  
57  
58  
59  
60

1  
2  
3  
4  
5  
6  
7  
8  
9  
10  
11  
12  
13  
14  
15  
16  
17  
18  
19  
20  
21  
22  
23  
24  
25  
26  
27  
28  
29  
30  
31  
32  
33  
34  
35  
36  
37  
38  
39  
40  
41  
42  
43  
44  
45  
46  
47  
48  
49  
50  
51  
52  
53  
54  
55  
56  
57  
58  
59  
60

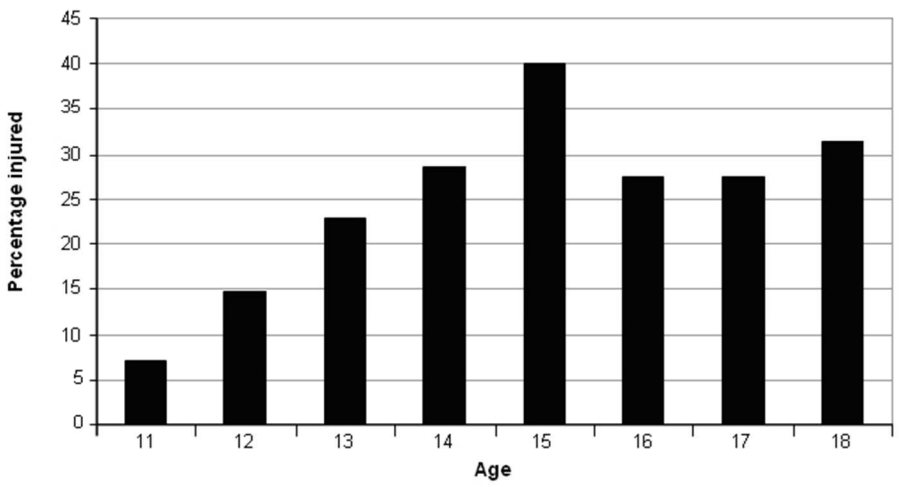

Age vs Injury Incidence

review only

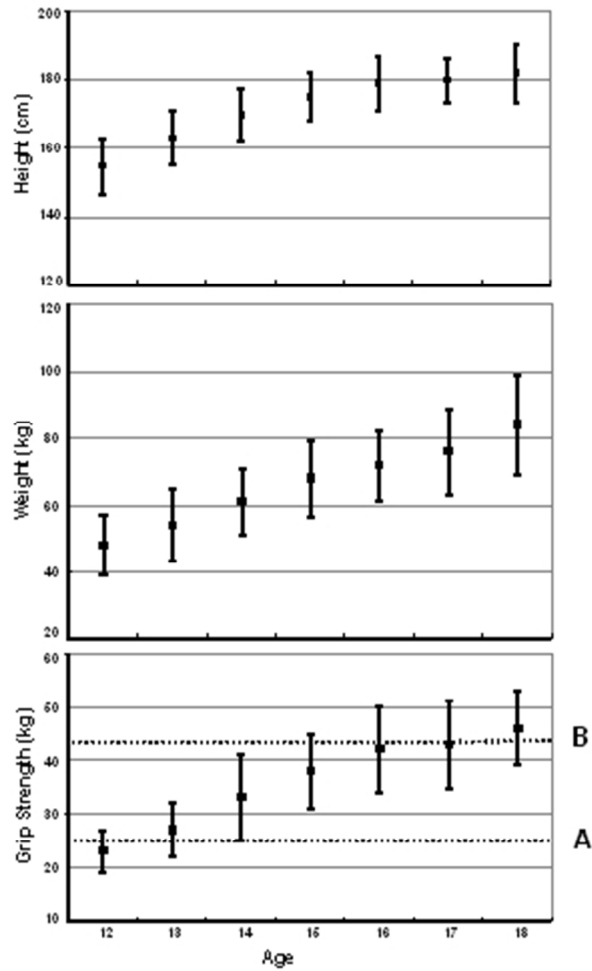

Changes in physical parameters by year group showing mean and range of values. (A previous threshold grip strength of 25kg, B current threshold grip strength of 43kg)  
91x128mm (96 x 96 DPI)

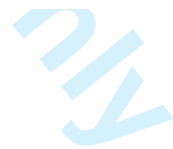

STROBE 2007 (v4) Statement—Checklist of items that should be included in reports of cohort studies

| Section/Topic             | Item # | Recommendation                                                                                                                                                                       | Reported on page # |
|---------------------------|--------|--------------------------------------------------------------------------------------------------------------------------------------------------------------------------------------|--------------------|
| Title and abstract        | 1      | (a) Indicate the study’s design with a commonly used term in the title or the abstract                                                                                               | 2                  |
|                           |        | (b) Provide in the abstract an informative and balanced summary of what was done and what was found                                                                                  | 2                  |
| <b>Introduction</b>       |        |                                                                                                                                                                                      |                    |
| Background/rationale      | 2      | Explain the scientific background and rationale for the investigation being reported                                                                                                 | 3                  |
| Objectives                | 3      | State specific objectives, including any prespecified hypotheses                                                                                                                     | 3                  |
| <b>Methods</b>            |        |                                                                                                                                                                                      |                    |
| Study design              | 4      | Present key elements of study design early in the paper                                                                                                                              | 3,4                |
| Setting                   | 5      | Describe the setting, locations, and relevant dates, including periods of recruitment, exposure, follow-up, and data collection                                                      | 3,4                |
| Participants              | 6      | (a) Give the eligibility criteria, and the sources and methods of selection of participants. Describe methods of follow-up                                                           | 3,4                |
|                           |        | (b) For matched studies, give matching criteria and number of exposed and unexposed                                                                                                  |                    |
| Variables                 | 7      | Clearly define all outcomes, exposures, predictors, potential confounders, and effect modifiers. Give diagnostic criteria, if applicable                                             | 3                  |
| Data sources/ measurement | 8*     | For each variable of interest, give sources of data and details of methods of assessment (measurement). Describe comparability of assessment methods if there is more than one group | 3,4                |
| Bias                      | 9      | Describe any efforts to address potential sources of bias                                                                                                                            |                    |
| Study size                | 10     | Explain how the study size was arrived at                                                                                                                                            | 3                  |
| Quantitative variables    | 11     | Explain how quantitative variables were handled in the analyses. If applicable, describe which groupings were chosen and why                                                         | 4                  |
| Statistical methods       | 12     | (a) Describe all statistical methods, including those used to control for confounding                                                                                                | 4                  |
|                           |        | (b) Describe any methods used to examine subgroups and interactions                                                                                                                  |                    |
|                           |        | (c) Explain how missing data were addressed                                                                                                                                          |                    |
|                           |        | (d) If applicable, explain how loss to follow-up was addressed                                                                                                                       |                    |
|                           |        | (e) Describe any sensitivity analyses                                                                                                                                                |                    |
| <b>Results</b>            |        |                                                                                                                                                                                      |                    |



|                          |     |                                                                                                                                                                                                                                                                                                                                                                                                               |            |
|--------------------------|-----|---------------------------------------------------------------------------------------------------------------------------------------------------------------------------------------------------------------------------------------------------------------------------------------------------------------------------------------------------------------------------------------------------------------|------------|
| Participants             | 13* | (a) Report numbers of individuals at each stage of study—eg numbers potentially eligible, examined for eligibility, confirmed eligible, included in the study, completing follow-up, and analysed<br>(b) Give reasons for non-participation at each stage<br>(c) Consider use of a flow diagram                                                                                                               | 4          |
| Descriptive data         | 14* | (a) Give characteristics of study participants (eg demographic, clinical, social) and information on exposures and potential confounders<br>(b) Indicate number of participants with missing data for each variable of interest<br>(c) Summarise follow-up time (eg, average and total amount)                                                                                                                | 4          |
| Outcome data             | 15* | Report numbers of outcome events or summary measures over time                                                                                                                                                                                                                                                                                                                                                | 4,5        |
| Main results             | 16  | (a) Give unadjusted estimates and, if applicable, confounder-adjusted estimates and their precision (eg, 95% confidence interval). Make clear which confounders were adjusted for and why they were included<br>(b) Report category boundaries when continuous variables were categorized<br>(c) If relevant, consider translating estimates of relative risk into absolute risk for a meaningful time period |            |
| Other analyses           | 17  | Report other analyses done—eg analyses of subgroups and interactions, and sensitivity analyses                                                                                                                                                                                                                                                                                                                |            |
| <b>Discussion</b>        |     |                                                                                                                                                                                                                                                                                                                                                                                                               |            |
| Key results              | 18  | Summarise key results with reference to study objectives                                                                                                                                                                                                                                                                                                                                                      | 6, 7, 8, 9 |
| <b>Limitations</b>       |     |                                                                                                                                                                                                                                                                                                                                                                                                               |            |
| Interpretation           | 20  | Give a cautious overall interpretation of results considering objectives, limitations, multiplicity of analyses, results from similar studies, and other relevant evidence                                                                                                                                                                                                                                    | 6, 7, 8, 9 |
| Generalisability         | 21  | Discuss the generalisability (external validity) of the study results                                                                                                                                                                                                                                                                                                                                         | 6, 7, 8, 9 |
| <b>Other information</b> |     |                                                                                                                                                                                                                                                                                                                                                                                                               |            |
| Funding                  | 22  | Give the source of funding and the role of the funders for the present study and, if applicable, for the original study on which the present article is based                                                                                                                                                                                                                                                 | 10         |

\*Give information separately for cases and controls in case-control studies and, if applicable, for exposed and unexposed groups in cohort and cross-sectional studies.

**Note:** An Explanation and Elaboration article discusses each checklist item and gives methodological background and published examples of transparent reporting. The STROBE checklist is best used in conjunction with this article (freely available on the Web sites of PLoS Medicine at <http://www.plosmedicine.org/>, Annals of Internal Medicine at <http://www.annals.org/>, and Epidemiology at <http://www.epidem.com/>). Information on the STROBE Initiative is available at [www.strobe-statement.org](http://www.strobe-statement.org).



**Variation in physical development in schoolboy rugby players - can maturity testing reduce mismatch?**

|                                 |                                                                                                                                                                                                                                                                                                                                                                                                          |
|---------------------------------|----------------------------------------------------------------------------------------------------------------------------------------------------------------------------------------------------------------------------------------------------------------------------------------------------------------------------------------------------------------------------------------------------------|
| Journal:                        | <i>BMJ Open</i>                                                                                                                                                                                                                                                                                                                                                                                          |
| Manuscript ID:                  | bmjopen-2012-001149.R1                                                                                                                                                                                                                                                                                                                                                                                   |
| Article Type:                   | Research                                                                                                                                                                                                                                                                                                                                                                                                 |
| Date Submitted by the Author:   | 14-May-2012                                                                                                                                                                                                                                                                                                                                                                                              |
| Complete List of Authors:       | Nutton, Richard; Royal Infirmary of Edinburgh, Orthopaedics and Trauma Hamilton, David; University of Edinburgh, Orthopaedics and Trauma Hutchison, James; University of Aberdeen, Orthopaedics and Trauma Mitchell, Martin; Royal Infirmary of Edinburgh, Orthopaedics and Trauma Simpson, Hamish; University of Edinburgh, Orthopaedics and Trauma MacLean, James; Perth Royal Infirmary, Orthopaedics |
| <b>Primary Subject Heading</b>: | Health policy                                                                                                                                                                                                                                                                                                                                                                                            |
| Secondary Subject Heading:      | Paediatrics, Sports and exercise medicine                                                                                                                                                                                                                                                                                                                                                                |
| Keywords:                       | Public health < INFECTIOUS DISEASES, PAEDIATRICS, SPORTS MEDICINE                                                                                                                                                                                                                                                                                                                                        |
|                                 |                                                                                                                                                                                                                                                                                                                                                                                                          |

SCHOLARONE™  
Manuscripts

1  
2  
3 **Variation in physical development in schoolboy rugby players - can maturity**  
4 **testing reduce mismatch?**  
5

6 Nutton RW<sup>1</sup>, Hamilton DF<sup>2</sup>, Hutchison JD<sup>3</sup>, Mitchell MJ<sup>1</sup>, Simpson AHRW<sup>1,2</sup>,  
7 MacLean JGB<sup>4</sup>  
8

- 9  
10 1. Department of Orthopaedics and Trauma, Royal Infirmary of Edinburgh, UK  
11 2. Department of Orthopaedics, University of Edinburgh, UK  
12 3. Department of Orthopaedic Surgery, University of Aberdeen, UK  
13 4. Department of Orthopaedics, Perth Royal Infirmary, UK  
14

15  
16 **Corresponding Authors:**

17  
18 Richard W. Nutton MD FRCS  
19 Consultant Orthopaedic Surgeon  
20 Department of Trauma and Orthopaedics  
21 Royal Infirmary of Edinburgh  
22 Old Dalkeith Road  
23 Little France  
24 Edinburgh  
25 EH16 4SA  
26 [Richard.Nutton@luht.scot.nhs.uk](mailto:Richard.Nutton@luht.scot.nhs.uk)  
27 **Tel: 0131 242 6644**  
28 **Fax: 0131 242 6534**  
29

30  
31 James G B MacLean FRCS  
32 Consultant Orthopaedic Surgeon  
33 Perth Royal Infirmary  
34 Perth  
35 PH1 1QJ  
36 [jamie.maclea@nhs.net](mailto:jamie.maclea@nhs.net)  
37 **Tel: 01738 473697**  
38 **Fax: 01738 473255**  
39

40  
41 **Suggested key words:** Adolescent; Rugby; Injury; Maturity; Screening  
42

43 **Word Count:** 2880  
44  
45  
46  
47  
48  
49  
50  
51  
52  
53  
54  
55  
56  
57  
58  
59  
60

## ABSTRACT

**Objectives:** This study set out to pursue means of reducing mismatch in schoolboy rugby players. The primary objective was to determine whether application of previously reported thresholds of height and grip strength could be used to distinguish those 15 year old boys appropriate to play under-18 school rugby from their peers. A secondary objective was to obtain normative data for height, weight and grip strength and to assess the variation within that data of current schoolboy rugby players.

**Design:** Cross sectional cohort study

**Setting:** Three Scottish schools and 'Regional Assessment Centres' organised by the Scottish Rugby Union

**Participants:** 472 rugby playing youths aged 15 (Regional Assessment Centres), 382 schoolboys aged between 12-18 years (3 schools),

**Outcome measures:** Height, weight and grip strength

**Results:**

97% of 15 year olds achieved the height and grip strength thresholds based on previous reported values. Larger mean values and wide variation of height, weight and grip strength were recorded in the schoolboy cohort. However, using the mean values of the cohort of 17 year olds as a new threshold, only 7.7% of 15 year olds would pass these thresholds.

**Conclusion:** Large morphological variation was observed in schoolboy rugby players of the same age. Physical maturity tests described in earlier literature as pre-participation screening for contact sports were not applicable to current day 15 year old rugby players. New criteria were measured and found to be better at identifying those 15 year old players who had sufficient physical development to play senior school rugby.

### Article focus

Potential for physical mismatch between schoolboy rugby players and assessment of established maturity testing methods to try to reduce this mismatch, and modifications based on new population data.

### Key messages

Large morphological variation was observed in schoolboy rugby players of the same age.

Previously reported parameters of physical maturity were not suitable to assess the current schoolboy rugby playing population.

New criteria, based on current players, were found to better differentiate 15 year old players as to their suitability to play senior school rugby, with the aim of reducing physical mismatch.

### Strengths and limitations

#### Strengths:

1. Evidence that current screening parameters are inadequately sensitive.
2. Current population data collected to describe cohorts of schoolboy rugby players.
3. Application of current data allows better assessment of physical maturity to inform the decision of whether an individual could play senior school rugby.

#### Limitations:

There is an urgent need to establish a robust system for recording injuries in order to substantiate the screening system.

## INTRODUCTION

Since the advent of professionalism in 1995, injury rates in Rugby Union have increased in the adult game<sup>1,2</sup> and although unproven, the same is suspected in schoolboy rugby<sup>3,4</sup>. Serious neck and spinal injuries are thought to be rare in youth rugby<sup>5</sup>. In 2010, however, Allan reported an unprecedented increase in the incidence of catastrophic spinal injuries amongst teenage rugby players admitted to the Queen Elizabeth National Spinal Injuries Unit in Glasgow<sup>6</sup>, disproportionate to the school-age playing population when compared with data for the other home nations<sup>7</sup>. Physical mismatch between players was highlighted as a possible contributory factor in these injuries.

The avoidance of mismatch is traditionally addressed by playing schoolboys in their year groups; however year groups combine at 16 to compete in senior (Under-18) school rugby. In contrast to the other home nations, Scottish schoolboys aged 15 are regularly involved in senior school rugby, in part due to the relatively small playing population and also due to the tradition of leaving senior school at an earlier age.

It is well recognised that within any selected year group a wide spectrum of physical maturity exists<sup>8</sup> and there is evidence that this is at its maximum between the ages of 13 and 15 years, during which peak growth velocity usually occurs. In some American states a maturity assessment is used as pre-participation screening for some collision sports<sup>9-11</sup>, and there is some evidence to suggest that matching athletes for physical maturity is associated with a reduced injury rate<sup>12</sup>. Previous studies have correlated specified height and grip strength values with the attainment of physical maturity as defined by the Tanner scale<sup>12-14</sup>. A similar maturity assessment was introduced by the Scottish Rugby Union (SRU) in the hope that, by differentiating 15 year old players by physical maturity, the risk of mismatch in this age group may be reduced.

The aim of this study was to determine whether the application of previously reported threshold measurements of height and grip strength could be used to distinguish those 15 year olds who might safely play senior (Under-18) school rugby. A secondary objective was to obtain normative data for physical characteristics (height, weight and grip strength) and to assess the variation within that data of current day schoolboy rugby players to investigate whether it might give a more sensitive assessment of physical maturity.

## MATERIALS AND METHODS

At the beginning of the 2009-10 season the Scottish Rugby Union (SRU) ruled that no 15 year old should play in the front row in senior school rugby. Any 15 year old wishing to play senior school rugby in an alternative position was required to undergo a maturity assessment (based on previously reported values)<sup>15</sup>. This was introduced as part of an intervention to improve safety in the game (“*Are you ready to play rugby?*”) and had been recommended by a subgroup of the Scottish Committee for Orthopaedics and Trauma (SCOT) in response to the increasing number of serious neck injuries observed in schoolboy rugby in Scotland.

An initial cohort of boys aged 15 years who wished to play senior school rugby was assessed by trained medical personnel, at several SRU-organised Regional Assessment Centres across Scotland. A specific testing protocol was followed for grip strength, height and weight. Grip strength was assessed with hand-held dynamometers (Jamar, Asimow Engineering Co, Los Angeles), calibrated as per the manufacturer’s recommendations. Testing was undertaken as recommended by the American Association of Hand Surgeons with the subjects seated, the elbow flexed at 90 degrees, and the wrist in neutral. After an initial trial, three attempts were made and the mean calculated. Standardised verbal encouragement was given during the test; the boys were blinded to the values achieved until the test had been completed. Both hands

were tested and the greater mean value used for analysis. Height and weight were measured using a Leicester Height Measure and Seca 761 Approved Medical Mechanical Floor Scales (Class III) respectively. To be regarded as physically mature, and therefore able to play in the under-18 age group, players had to fulfil the following physical conditions: height >165cm, and grip strength > 25kg<sup>15</sup>.

In the second part of this study a cohort of 382 rugby-playing boys aged 12 to 18 years were assessed at three Scottish rugby-playing secondary schools between December 2009 and October 2010. Height, weight, and grip strength were measured by trained personnel using the same standardised protocol and equipment as in the initial cohort. Ethical approval was obtained from the Fife and Forth Valley Ethics Committee (REC No: 09/S501/62) to undertake this part of the study. Individual consent was obtained from the boys who participated and countersigned by their parents where appropriate. Supervision of the study was by members of the SCOT subgroup.

### Data analysis

Data were analysed using SPSS (version 14, IBM, Chicago, USA). Data were manually assessed for normality with histograms. Descriptive data are reported as means with standard deviations (SD) as a measure of dispersion. Differences between age grades were assessed with one way analysis of variance (ANOVA, General Linear Model). A Bonferroni correction was applied to reduce the chance of a type 1 error associated with multiple testing. Effect sizes are reported with the Eta<sup>2</sup> statistic. Post-hoc tests were performed with Tukey's HSD test to assess individual comparisons. Statistical significance was accepted as p<0.05.

## RESULTS

472 boys aged 15 years presented to the SRU-arranged Regional Assessment Centres. Their mean height was 177 cm [SD 7 cm, range 156-199cm], mean weight 74.4 kg [SD 13.1 kg, range 46.0-127.1 kg] and mean grip strength 44.2 kg [SD 7.7 kg, range 20.5-80.0 kg]. Using the criteria established from previous studies as an indication of physical maturity (height >165cms, grip strength > 25kg), 97.2% were deemed physically mature and thus eligible to play in the under 18 age group.

382 schoolboy rugby players aged 12-18 years were similarly assessed in the second cohort study at the three schools. Mean height, weight and grip strength generally increased with age, reflecting growth (Table 1 and Figure 1).

**Table 1 – physical parameters by age grade, mean (SD)**

| Age                | 12        | 13        | 14        | 15        | 16        | 17        | 18        |
|--------------------|-----------|-----------|-----------|-----------|-----------|-----------|-----------|
| Participants (n)   | 54        | 66        | 63        | 65        | 55        | 62        | 17        |
| Height (cm)        | 155 (7.6) | 163 (7.8) | 170 (7.5) | 175 (7.0) | 179 (7.5) | 180 (6.2) | 182 (8.1) |
| Weight (kg)        | 48 (9.2)  | 54 (10.8) | 61 (9.8)  | 68 (11.4) | 72 (10.2) | 76 (12.8) | 84 (14.9) |
| Grip Strength (kg) | 23 (3.9)  | 27 (5.0)  | 33 (8.1)  | 38 (6.9)  | 42 (8.1)  | 43 (8.1)  | 46 (6.9)  |

Variation in all physical parameters (height, weight and grip strength) was determined by age group (ANOVA,). Modest to large effect sizes were observed for each parameter (Table 2).

**Table 2 – Effect of age on variance in assessed physical parameters (ANOVA)**

|               | F (6, 382) | significance | $\eta^2$ |
|---------------|------------|--------------|----------|
| Height        | 92.27      | p= <0.000    | 0.597    |
| Weight        | 58.14      | p= <0.000    | 0.483    |
| Grip Strength | 73.33      | p= <0.000    | 0.541    |

Post hoc testing (Tukey HSD test) demonstrated significant differences between each variable in every age group up to the age of 15 years. No significant differences were observed between the 16, 17 and 18 years age groups for height or grip strength, nor between the 15, 16 and 17 and 18 years age brackets for weight (Table 3).

**Table 3 – Inter age group comparisons (mean difference [95% CI])**

| Age   | Height                      | Weight                       | Grip Strength               |
|-------|-----------------------------|------------------------------|-----------------------------|
| 12-13 | 8.18 [4.21, 12.15], p=0.000 | 6.05 [0.07, 12.03], p=0.045  | 3.85 [0.10, 7.60], p=0.039  |
| 13-14 | 6.55 [2.74, 10.36], p=0.000 | 7.37 [1.63, 13.10], p=0.003  | 6.23 [2.63, 9.82], p=0.000  |
| 14-15 | 5.32 [1.49, 9.14], p=0.001  | 6.63 [0.87, 12.39], p=0.013  | 4.50 [0.89, 8.11], p=0.05   |
| 15-16 | 4.22 [0.26, 8.19], p=0.028  | 4.45 [-1.52, 10.42], p=0.292 | 3.82 [0.08, 7.56], p=0.042  |
| 16-17 | 0.58 [-3.43, 4.59], p=0.1   | 4.08 [-1.97, 10.14], p=0.417 | 1.59 [-2.19, 5.37], p=0.876 |
| 17-18 | 1.94 [-4.13, 8.01], p=0.964 | 7.90 [-1.26, 17.05], p=0.142 | 2.84 [-2.88, 8.56], p=0.763 |

Differences were however apparent between the 15 and 17 years age groups for height (difference in mean = 4.80, 95%CI [0.97, 8.65]), weight (difference in mean = 8.53 [2.73, 14.34]) and grip strength (difference in mean = 5.41 [1.79, 9.03]).

As the median age of boys playing senior school rugby in Scotland was 17 years, we assessed how many 15 year olds would meet the mean height, weight and grip strength of the 17 year age group: 180 cm height, 76 kg weight and 43 kg grip strength. The numbers meeting each of these criteria, and various combinations of the criteria, are shown in Table 4. Only 13.8% of the 15 year olds had the mean grip strength and height of a 17 year old, whilst including weight as an additional requirement reduced this figure to 6.2%.

**Table 4 - Consequences of testing 15 year old boys (n=65) against the mean values for 17 year old boys (n=62; height 180 cm, weight 76 kg, grip strength 43 kg)**

|                                | Number above 17 year old mean | Number below 17 year old mean | % Meeting requirement |
|--------------------------------|-------------------------------|-------------------------------|-----------------------|
| Grip Strength + Height         | 9                             | 56                            | 13.80%                |
| Grip Strength + Weight         | 5                             | 60                            | 7.70%                 |
| Grip Strength, Height + Weight | 4                             | 61                            | 6.20%                 |



1  
2  
3 The effect of applying thresholds to the cohort data is highlighted in Figure 1, where the  
4 heavy dashed line reflects the mean values recorded for the 17 year old group, and the light  
5 dashed line the historical values (where appropriate). Of note is that current day 14 year olds  
6 (95% confidence interval of mean) meet the historical height requirement, and 13 year olds  
7 (95% CI of mean) meet the historical grip strength requirement.  
8  
9

## 10 DISCUSSION

11 The popularity of rugby as a sport for teenagers is threatened by concerns about the potential  
12 for serious injury<sup>16,17</sup>. The professional game has become more physical, and injuries in elite  
13 players are commonplace<sup>18,19</sup>.

14  
15 It is reasonable to suggest that where younger players compete with older age groups in  
16 contact sports they are exposed to higher contact forces which may be compounded if they are  
17 not physically matched. This was the reasoning behind incorporating physical assessments as  
18 part of the “*Are you ready to play rugby*” programme introduced by the SRU in 2009 in  
19 response to the rising incidence of serious spinal injuries in schoolboy rugby in Scotland.  
20 During puberty there is an increase in body weight, principally due to muscle mass, which can  
21 be quantified by measuring grip strength<sup>15</sup>. Our analysis focussed on 15 year old boys as this  
22 age represents the watershed between junior and senior school rugby with some individuals  
23 playing at either or both levels.  
24  
25

26 The results of applying previous threshold values for height and grip strength failed to  
27 discriminate between a large cohort of current day 15 year old rugby players with almost all  
28 (97.2%) deemed as physically mature. It may be that our study population was a more athletic  
29 group than that on which the published parameters were based, namely youths in a juvenile  
30 correctional facility in Washington State<sup>15</sup>. However our schoolboy cohort results were  
31 similar to normative data for American adolescents reported in a previous study<sup>20</sup>. In contrast,  
32 the cohort of 15 year olds tested in the SRU Regional Assessment Centres were not  
33 comparable to previous normative data and perhaps represent a subset of aspiring athletes  
34 likely to be stronger and bigger than average for their year group. The players tested in this  
35 group all wished to play at a more senior level, and are likely to be self selecting. Even so,  
36 and of more concern, the range of values for height (1.56-1.99 m), weight (46-127 kg) and  
37 grip strength (21-80 kg) recorded in this group of 15 year old boys is remarkable and  
38 demonstrates the substantial variability in physical development irrespective of age even  
39 within this subgroup of boys. This is supported by the wide standard deviations in both the  
40 SRU Regional Assessment Centre cohort and our schoolboy cohort samples, and also the  
41 confidence intervals surrounding the mean difference between age groups for all assessed  
42 parameters in the schoolboy study (Table 3).  
43  
44

45 Normative data on the physical attributes of adolescent rugby players in the literature is  
46 limited and it was felt that this was fundamental to distinguishing between different players of  
47 the same age. Whilst significant differences in height, weight and grip strength are evident  
48 across age groups in the schoolboy study (ANOVA, Table 2), *post hoc* testing reveals initial  
49 year on year significant differences only up until the age of 15 years. Thereafter, the trend of  
50 increasing mean values continues in weight and grip strength, but mean height increases are  
51 seen to level off over 16 years (Figure 1).  
52

53 Height was previously recognised<sup>21</sup> as an important determinant of physical maturity with the  
54 period of peak growth around the “growth spurt” associated with an increased risk of injury.  
55 Peak height velocity occurs at a median age of 14 years in North American boys with the 95%  
56 confidence interval extending from 11.5 to 15.5 years<sup>22</sup>. It is then not surprising that height is  
57 less likely to be a discriminator when the 15 year age group, at the upper limit of the growth  
58 spurt, is being assessed. From the normative data obtained it seemed more logical to compare  
59  
60

1  
2  
3 the height, weight and grip strength of 15 year olds with the means of those age groups they  
4 would encounter if they played in senior school rugby. As 17 years is the median age of  
5 senior school rugby (16 -18 year group), the mean values for a 17 year old were chosen as  
6 threshold values which a 15 year old should achieve if he were to enjoy a degree of physical  
7 compatibility with these older players, hopefully reducing his risk of injury. Table 4  
8 highlights the effect of applying the mean values of the 17 year old boys to the 15 year old  
9 age group. When the different combinations of height, weight and grip strength were  
10 assessed, height proved to be the least discriminatory, as predicted. It has been recorded that  
11 there is a group of taller boys who, whilst regarded as pubertally mature, do not possess the  
12 muscular strength of peers of similar height<sup>15</sup>. It was therefore decided that grip strength and  
13 weight should be selected as the key parameters for testing. Using these parameters alone,  
14 7.7% of 15 year olds in this cohort achieved the mean weight and grip strength of a 17 year  
15 old.

16  
17 Whilst mismatch is recognised as an issue internationally, neither maturity nor grip strength  
18 testing is routinely tested in the major rugby playing countries. In New Zealand, both age and  
19 weight are taken into account in banding for youth rugby. Players who are significantly  
20 heavier than their peers may play at a more senior grade and underweight individuals may  
21 play down an age grade, although variation does exist between different districts. South  
22 African youth rugby is banded according to age, with players only able to play within a  
23 certain age group if their age falls within two years of that group. The *BokSmart*<sup>23</sup> rugby  
24 safety initiative was launched by the South African Rugby Union in 2009 to combat a  
25 comparatively high rate of catastrophic injuries, both in youth and senior rugby. This was a  
26 similar programme to the *RugbySmart* initiative in New Zealand<sup>24</sup> which commenced in 2001  
27 and has been shown to reduce the incidence of spinal injuries<sup>25</sup>. *BokSmart* includes  
28 comparison of individuals with normative data for age groups including body mass, fitness  
29 tests and some basic strength tests. Guidelines for players wishing to play out with their age  
30 group are well defined, requiring full rugby-specific assessments by qualified sports  
31 practitioners, letters from conditioning coaches, team doctors and coaches, confirming the  
32 suitability of the player. A similar approach exists in Australia with streaming according to  
33 age group up to U19 level, and players being unable to compete more than two years above  
34 their respective age group<sup>26</sup>. Those who wish to play up beyond the two-year window require  
35 their coach to fill out an exemption form addressing issues such as level of experience,  
36 playing position, use of strength training, and perceived level of maturity. In none of these  
37 countries do any objective criteria exist for physical testing.

38  
39  
40 Currently the SRU have adopted the condition that any 15 year old wishing to play Under-18  
41 rugby, in a position other than the front row, has to achieve the mean weight and grip strength  
42 of 17 year old players. Front row players aged 15 years are not allowed to play in the Under-  
43 18 age group; this decision was based on reports in the literature that serious neurological  
44 damage was more common following neck injury sustained in the scrum in UK schoolboys  
45 rather than the tackle<sup>7</sup>. Specified under-16 age group rugby exists in some countries and the  
46 delay this imparts on the progress of 15 year olds into senior school rugby is logical,  
47 particularly as this may coincide with a time in their physical development where there is  
48 greatest variation in physical maturity. To date our focus has been on the 15 year age group.  
49 With further data collection it may be that criteria could be identified for all age bands, with  
50 players of similar physical development playing together as they mature at differing rates.  
51 Potentially this could identify more developed individuals who should play in older age  
52 groups thus reducing the risk of injury to their age peers, or immature individuals who should  
53 play in younger age groups, reducing their own risk of injury.

54  
55 In the absence of robust injury data, but confronted with an upsurge in serious neck injury in  
56 Scotland, it was felt that the introduction of maturity assessment in schoolboy rugby was a  
57 valuable adjunct to other measures that have been taken to increase safety. To date since the  
58 inception of these measures, no schoolboy rugby player with a serious neck injury has been  
59  
60

1  
2  
3 admitted to the National Spinal Injuries Unit in Glasgow. It is accepted, however, that the  
4 screening method we are proposing is hypothetical without any injury data to support its  
5 efficacy. It is however based on current population data involving schoolboy rugby players,  
6 applying concepts established in American schools contact sports, based on the only literature  
7 available on this subject.  
8

9 **In conclusion we have demonstrated that maturity testing using previously reported**  
10 **parameters fails to differentiate between current day 15 year old Scottish schoolboy rugby**  
11 **players. Matching schoolboys for weight and grip strength, introducing a safety margin based**  
12 **on current population data, where younger players wish to compete above their age group is**  
13 **more likely to be an effective method of reducing mismatch.**  
14

15 **Reducing the risk of injury in contact sports should be a universal aim, and it will only be**  
16 **achieved once we know accurately the size and severity of the problem. Previous authors**  
17 **have expressed concerns regarding the wide variation in shape and size of same-aged**  
18 **schoolboys. We suggest that inclusion of indicators of physical maturity within an injury**  
19 **surveillance framework is important if we are to establish the risks associated with mismatch**  
20 **of age grade players. Until such data is available it would seem logical to try and minimise**  
21 **mismatch which is what we have set out to achieve with this initiative.**  
22  
23  
24  
25

26 **ACKNOWLEDGEMENTS:** The authors acknowledge the assistance of the staff at the three  
27 secondary schools visited, particularly the heads of department for physical education. Thanks  
28 must also be paid to the continued support from the SRU, and in particular to the efforts of  
29 Nick Rennie and Dr James Robson. The authors also thank the doctors, physiotherapists,  
30 medical students, and research personnel for the organisation of testing, and gathering of the  
31 data. Special thanks must go to Deborah MacDonald, Gavin MacPherson, Sally-Anne Phillips  
32 and Robert Wallace.  
33  
34

35 **FUNDING:** The first cohort of testing was funded by the Scottish Rugby Union. The second  
36 cohort of schools based testing received support from the Hearts and Balls charity to purchase  
37 testing equipment.  
38  
39

40 **COMPETING INTERESTS:** None  
41  
42

43 **FIGURE LEGEND**  
44

45 **Figure 1 – Assessed physical parameters with cut-off thresholds**  
46  
47

48 **Legend:** Mean values with 95% confidence intervals for (a) height, (b) weight and (c) grip  
49 strength of the 382 schoolboys assessed. The heavy dashed line represents the 17 year old  
50 mean, and allows direct comparison of the number of younger boys likely to achieve this  
51 value. The lighter dashed line reflects the previously used criteria (height and grip strength  
52 only) demonstrating the poor reflection of these previous scores on current day Scottish  
53 schoolboy rugby players  
54  
55  
56  
57  
58  
59  
60

## | REFERENCES

- 1  
2  
3  
4  
5 1 Quarrie KL, Hopkins WG. Changes in player characteristics and match activities in  
6 Bledisloe Cup rugby union from 1972 to 2004. *J Sports Sci.* 2007 Jun; 25(8):895-903  
7
- 8 2. Garroway WM, Lee AJ, Hutton SJ, Russell EBAW, Macleod DAD. Impact of  
9 professionalism on injuries in rugby union. *Br J Sports Med* 2000; 34:348-351  
10
- 11 3 Haseler CM, Carmont MR, England M. The epidemiology of injuries in English youth  
12 community rugby players. *Br J Sports Med* 2010;44,1093-1099  
13
- 14 4 McIntosh AS, McCrory P, Finch CF, et al. Head, face and neck injury in youth rugby:  
15 incidence and risk factors. *Br J Sports Med* 2010;44:188 – 93.  
16
- 17 5 Emery CA. Injury prevention in paediatric sport-related injuries: a scientific approach. *Br J*  
18 *Sports Med* 2010;44:64 – 9.  
19
- 20 6 Allan DB, Brydone AS. Spinal injuries in Scottish youth rugby.  
21 Presentation COMOC Glasgow 2010.  
22
- 23 7 Maclean JGB, Hutchison JD. Serious neck injuries in U19 rugby union players: an audit of  
24 admissions to spinal injury units in Great Britain and Ireland. *Br J Sports Med* Published  
25 Online First: December 2011. doi:10.1136/bjsports.2011.090183  
26
- 27 8 Silver JR. The impact of the 21st century on rugby injuries. *Spinal Cord* 2002; 40: 552-559  
28
- 29 9 Caine DJ, Broekhoff J. Maturity assessment: A viable preventive measure against physical  
30 and psychological insult to the young athlete? *The Physician and Sports Medicine.* 1987; 15:  
31 67–80  
32
- 33 10 Grafe MW, Paul GR, Foster TE. The preparticipation examination for high school and  
34 college athletes. *Clinics in Sports Med.* 1997; 16:569-591  
35
- 36 11 <http://www.mdch.state.mi.us/pha/vipf2/football.htm> (last accessed 22.11.2011)  
37
- 38 12 Kreipe RE, Gewanter HL. Physical maturity screening for participation in sports.  
39 *Pediatrics* 1985; 75:1076-1080  
40
- 41 13 Backous DD, Friedl KE, Smith NJ, Parr TJ, Carpine WD Jr. Soccer injuries and their  
42 relation to physical maturity. *Am J Dis Child.* 1988 Aug; 142(8):839-842  
43
- 44 14 Tanner JM. Growth of bone, muscle, and fat during childhood and adolescence. In: Lodge  
45 ME. ed. Growth and development of mammals. London: Butterworths, 1968.  
46
- 47 15 Backous DD, Farrow JA, Friedl K. Assessment of pubertal maturity in boys, using height  
48 and grip strength. *J Adolesc Health Care.* 1990 Nov; 11(6):497-500  
49
- 50 16 Boufous S, Finch CF, Bauman A. Parental safety concerns - a barrier to sport and physical  
51 activity in children? *Aust NZ J Public Health* 2004; 28:482-486  
52
- 53 17 Nicholl JP, Coleman P, Williams BT. The epidemiology of sports and exercise related  
54 injury in the United Kingdom. *Br J Sports Med* 1995; 29:232–238  
55  
56  
57  
58  
59  
60

1  
2  
3 18 Brooks JHM, Kemp SPT. Injury-prevention priorities according to playing position in  
4 professional rugby union players *Br J Sports Med* 2011;45:765–775.

5  
6 19 Fuller C W, Ashton T, Brooks JH, et al. Injury risks associated with tackling in rugby  
7 union. *Br J Sports Med* 2010;44:159 – 67 .

8  
9 20 Mathieowitz V, Wiemer DM, Federman SM. Grip and pinch strength: norms for 6 to 19  
10 yr-olds. *Am J Occ Health* 1986; 40(10):705-712

11  
12 21 Caine DJ, Broekhoff J. Maturity assessment: A viable preventive measure against physical  
13 and psychological insult to the young athlete? *The Physician and Sports Medicine* 1987;  
14 15(3):57-80

15  
16 22 Tanner JM, Davies PSW. Clinical longitudinal standards for height and height velocity for  
17 North American children. *J Pediatr* 1985; 107:317-329

18  
19 23 Boksmart <http://www.sarugby.co.za/boksmart/default.aspx> (last accessed 22.11.2011)

20  
21 24 RugbySmart [http://www.nzrugby.co.nz/the\\_game/safety/rugbysmart](http://www.nzrugby.co.nz/the_game/safety/rugbysmart) (last accessed  
22 22.11.2011)

23  
24 25 Quarrie KL, Gianotti SM, Hopkins WG, Hume PA. Effect of a nationwide injury  
25 prevention programme on serious spinal injuries in New Zealand rugby union: ecological  
26 study. *BMJ* 2007 Jun 2; 334(7604):1150

27  
28 26 Australian Rugby Union Policy  
29 <http://www.rugby.com.au/LinkClick.aspx?fileticket=2hjJABFRanE%3d&tabid=1970> (last  
30 accessed 22.11.2011)

1  
2  
3  
4  
5  
6  
7  
8  
9  
10  
11  
12  
13  
14  
15  
16  
17  
18  
19  
20  
21  
22  
23  
24  
25  
26  
27  
28  
29  
30  
31  
32  
33  
34  
35  
36  
37  
38  
39  
40  
41  
42  
43  
44  
45  
46  
47  
48  
49  
50  
51  
52  
53  
54  
55  
56  
57  
58  
59  
60

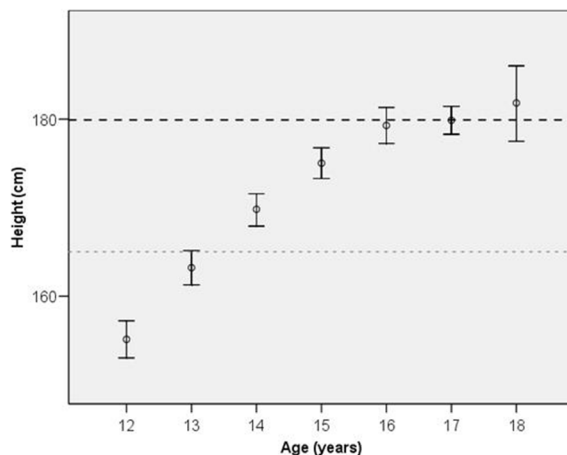

Legend: Mean values with 95% confidence intervals for (a) height, (b) weight and (c) grip strength of the 382 schoolboys assessed. The heavy dashed line represents the 17 year old mean, and allows direct comparison of the number of younger boys likely to achieve this value. The lighter dashed line reflects the previously used criteria (height and grip strength only) demonstrating the poor reflection of these previous scores on current day Scottish schoolboy rugby players  
254x190mm (96 x 96 DPI)

View Only

1  
2  
3  
4  
5  
6  
7  
8  
9  
10  
11  
12  
13  
14  
15  
16  
17  
18  
19  
20  
21  
22  
23  
24  
25  
26  
27  
28  
29  
30  
31  
32  
33  
34  
35  
36  
37  
38  
39  
40  
41  
42  
43  
44  
45  
46  
47  
48  
49  
50  
51  
52  
53  
54  
55  
56  
57  
58  
59  
60

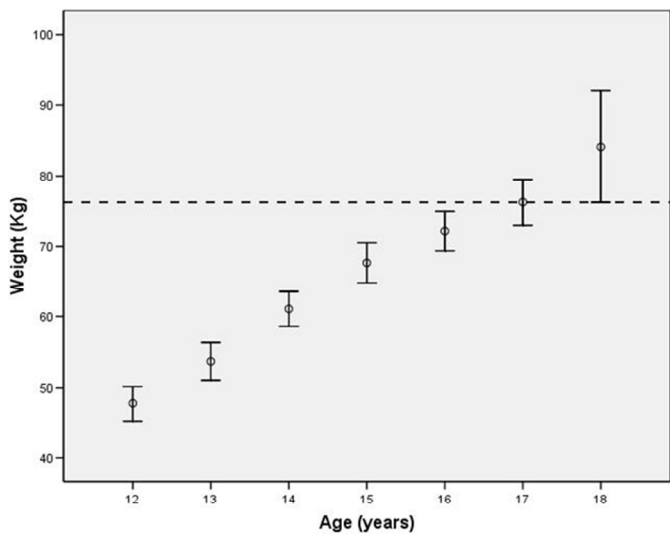

group as figure 1 (a,b and c) with same legend  
254x190mm (96 x 96 DPI)

ew only

1  
2  
3  
4  
5  
6  
7  
8  
9  
10  
11  
12  
13  
14  
15  
16  
17  
18  
19  
20  
21  
22  
23  
24  
25  
26  
27  
28  
29  
30  
31  
32  
33  
34  
35  
36  
37  
38  
39  
40  
41  
42  
43  
44  
45  
46  
47  
48  
49  
50  
51  
52  
53  
54  
55  
56  
57  
58  
59  
60

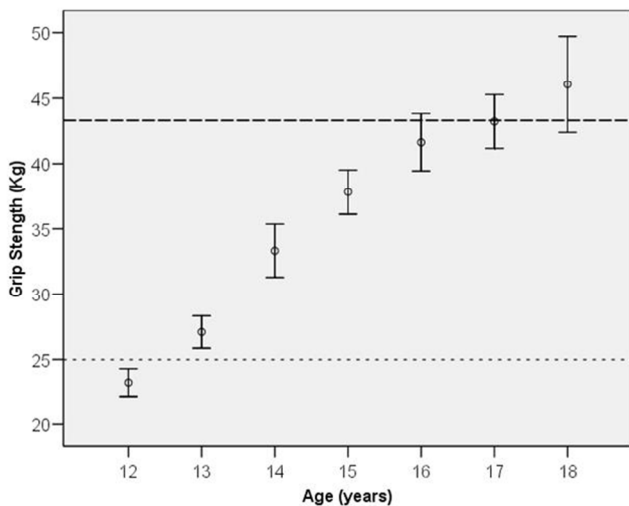

group with figure 1 a and b with single legend please  
254x190mm (96 x 96 DPI)

Review only



STROBE 2007 (v4) Statement—Checklist of items that should be included in reports of cohort studies

| Section/Topic             | Item # | Recommendation                                                                                                                                                                       | Reported on page # |
|---------------------------|--------|--------------------------------------------------------------------------------------------------------------------------------------------------------------------------------------|--------------------|
| Title and abstract        | 1      | (a) Indicate the study’s design with a commonly used term in the title or the abstract                                                                                               | 2                  |
|                           |        | (b) Provide in the abstract an informative and balanced summary of what was done and what was found                                                                                  | 2                  |
| <b>Introduction</b>       |        |                                                                                                                                                                                      |                    |
| Background/rationale      | 2      | Explain the scientific background and rationale for the investigation being reported                                                                                                 | 3                  |
| Objectives                | 3      | State specific objectives, including any prespecified hypotheses                                                                                                                     | 3                  |
| <b>Methods</b>            |        |                                                                                                                                                                                      |                    |
| Study design              | 4      | Present key elements of study design early in the paper                                                                                                                              | 3,4                |
| Setting                   | 5      | Describe the setting, locations, and relevant dates, including periods of recruitment, exposure, follow-up, and data collection                                                      | 3,4                |
| Participants              | 6      | (a) Give the eligibility criteria, and the sources and methods of selection of participants. Describe methods of follow-up                                                           | 3,4                |
|                           |        | (b) For matched studies, give matching criteria and number of exposed and unexposed                                                                                                  |                    |
| Variables                 | 7      | Clearly define all outcomes, exposures, predictors, potential confounders, and effect modifiers. Give diagnostic criteria, if applicable                                             | 3                  |
| Data sources/ measurement | 8*     | For each variable of interest, give sources of data and details of methods of assessment (measurement). Describe comparability of assessment methods if there is more than one group | 3,4                |
| Bias                      | 9      | Describe any efforts to address potential sources of bias                                                                                                                            |                    |
| Study size                | 10     | Explain how the study size was arrived at                                                                                                                                            | 3                  |
| Quantitative variables    | 11     | Explain how quantitative variables were handled in the analyses. If applicable, describe which groupings were chosen and why                                                         | 4                  |
| Statistical methods       | 12     | (a) Describe all statistical methods, including those used to control for confounding                                                                                                | 4                  |
|                           |        | (b) Describe any methods used to examine subgroups and interactions                                                                                                                  |                    |
|                           |        | (c) Explain how missing data were addressed                                                                                                                                          |                    |
|                           |        | (d) If applicable, explain how loss to follow-up was addressed                                                                                                                       |                    |
|                           |        | (e) Describe any sensitivity analyses                                                                                                                                                |                    |
| <b>Results</b>            |        |                                                                                                                                                                                      |                    |

|                          |     |                                                                                                                                                                                                                                                                                                                                                                                                               |            |
|--------------------------|-----|---------------------------------------------------------------------------------------------------------------------------------------------------------------------------------------------------------------------------------------------------------------------------------------------------------------------------------------------------------------------------------------------------------------|------------|
| Participants             | 13* | (a) Report numbers of individuals at each stage of study—eg numbers potentially eligible, examined for eligibility, confirmed eligible, included in the study, completing follow-up, and analysed<br>(b) Give reasons for non-participation at each stage<br>(c) Consider use of a flow diagram                                                                                                               | 4          |
| Descriptive data         | 14* | (a) Give characteristics of study participants (eg demographic, clinical, social) and information on exposures and potential confounders<br>(b) Indicate number of participants with missing data for each variable of interest<br>(c) Summarise follow-up time (eg, average and total amount)                                                                                                                | 4          |
| Outcome data             | 15* | Report numbers of outcome events or summary measures over time                                                                                                                                                                                                                                                                                                                                                | 4,5        |
| Main results             | 16  | (a) Give unadjusted estimates and, if applicable, confounder-adjusted estimates and their precision (eg, 95% confidence interval). Make clear which confounders were adjusted for and why they were included<br>(b) Report category boundaries when continuous variables were categorized<br>(c) If relevant, consider translating estimates of relative risk into absolute risk for a meaningful time period |            |
| Other analyses           | 17  | Report other analyses done—eg analyses of subgroups and interactions, and sensitivity analyses                                                                                                                                                                                                                                                                                                                |            |
| <b>Discussion</b>        |     |                                                                                                                                                                                                                                                                                                                                                                                                               |            |
| Key results              | 18  | Summarise key results with reference to study objectives                                                                                                                                                                                                                                                                                                                                                      | 6, 7, 8, 9 |
| <b>Limitations</b>       |     |                                                                                                                                                                                                                                                                                                                                                                                                               |            |
| Interpretation           | 20  | Give a cautious overall interpretation of results considering objectives, limitations, multiplicity of analyses, results from similar studies, and other relevant evidence                                                                                                                                                                                                                                    | 6, 7, 8, 9 |
| Generalisability         | 21  | Discuss the generalisability (external validity) of the study results                                                                                                                                                                                                                                                                                                                                         | 6, 7, 8, 9 |
| <b>Other information</b> |     |                                                                                                                                                                                                                                                                                                                                                                                                               |            |
| Funding                  | 22  | Give the source of funding and the role of the funders for the present study and, if applicable, for the original study on which the present article is based                                                                                                                                                                                                                                                 | 10         |

\*Give information separately for cases and controls in case-control studies and, if applicable, for exposed and unexposed groups in cohort and cross-sectional studies.

**Note:** An Explanation and Elaboration article discusses each checklist item and gives methodological background and published examples of transparent reporting. The STROBE checklist is best used in conjunction with this article (freely available on the Web sites of PLoS Medicine at <http://www.plosmedicine.org/>, Annals of Internal Medicine at <http://www.annals.org/>, and Epidemiology at <http://www.epidem.com/>). Information on the STROBE Initiative is available at [www.strobe-statement.org](http://www.strobe-statement.org).
